# Supplementary material for: S-Allylcysteine Attenuates Myocardial Injury Via Antioxidant Pathway in Ovariectomised Rat Model
Source: Research Square preprint supplement (doi:10.21203/rs.3.rs-6158102/v1), 2025-03-11
Supplement: Supplementary file 1 [file 0b88a5806e4bc8661b5be1ba.docx]

**Supplementary File: Full Western Blots**

Housekeeping Gene


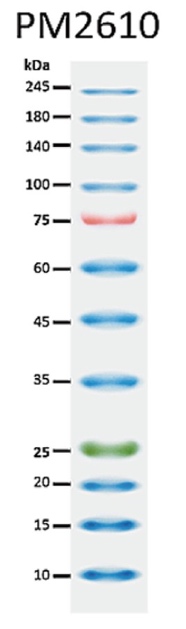


n=1 (GAPDH)

kDa

OVXMS

OVXM

OVXS

OVX

Sham

100 ––





75 ––

60 –––

45 ––

**GAPDH (36 kDa)**

**36 ––**

35 ––

25 ––

ExcelbandTM Enhanced 3-Colour High Ranged Protein Marker

(SMOBIO Technology, Inc.)

n=2 (GAPDH) – Representative Image

OVXMS

OVXM

OVXS

OVX

Sham

kDa

25 ––

45 ––

60 –––

75 ––

100 ––





**GAPDH (36 kDa)**

**36 ––**

35 ––

n=3 (GAPDH) Representative Image

kDa

Sham

OVX

OVXS

OVXM

OVXMS

100 ––

75 ––

60 –––

45 ––

35 ––





**36 ––**

**GAPDH (36 kDa)**

25 ––

Fig 6B (NOX-2)

n=1 (NOX-2) Representative Image

OVX

Sham

OVXS

OVXM

OVXMS

15 ––

35 ––

100 ––

45 ––

10 ––


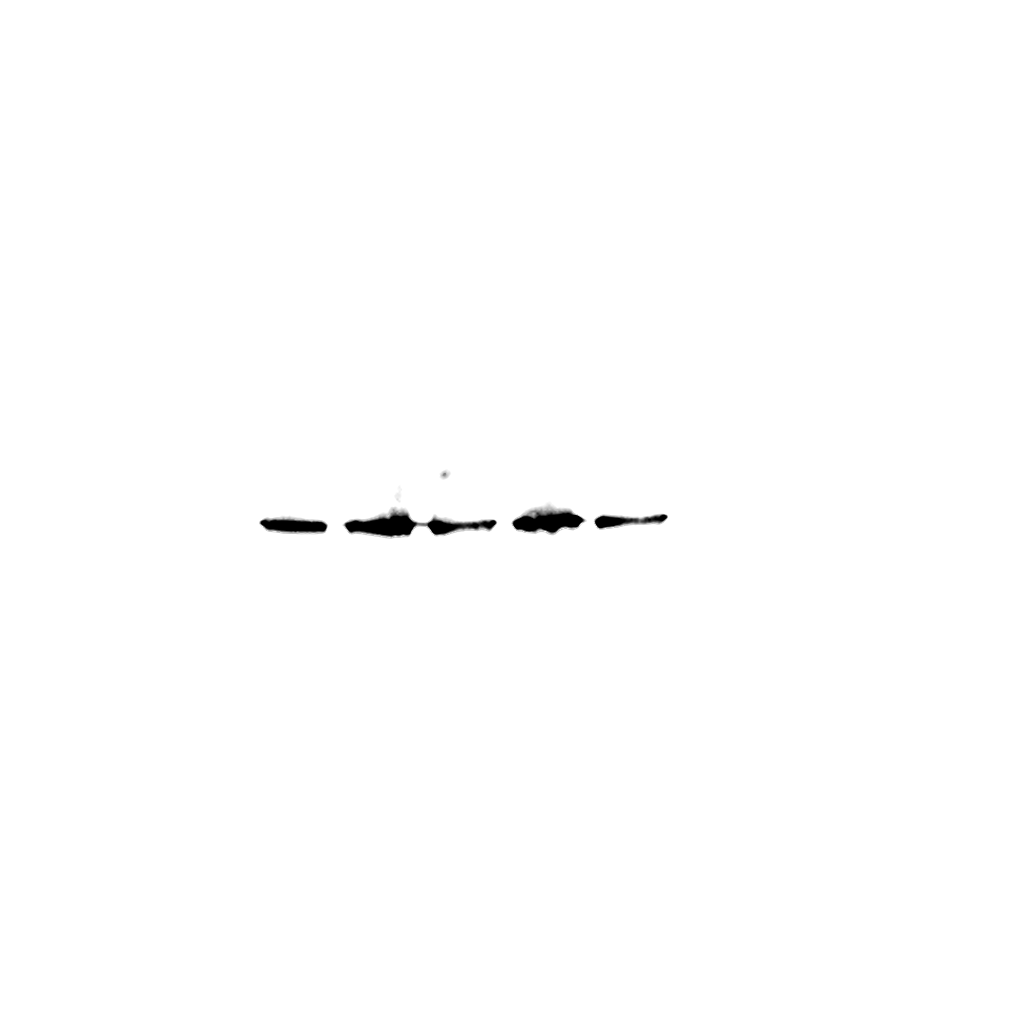


kDa

75 ––

**NOX-2 (65 kDa)**

**65 ––__**

60 ––

25 ––

20 ––

n=2 (NOX-2)

kDa

Sham

OVXMS

OVXS

OVXM

OVX





45 ––

60 ––

100 ––

75 ––

**65 ––__**

**NOX-2 (65 kDa)**

n=3 (NOX-2)

kDa

Sham

OVXMS

OVXS

OVXM

OVX





60 ––

**65 ––__**

75 ––

100 ––

45 ––

**NOX-2 (65 kDa)**


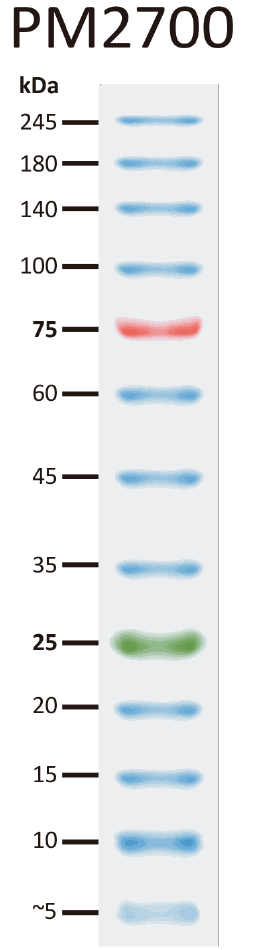
Fig 8A

n=1 (CSE)





Sham

OVX

OVXS

OVXM

OVXMS

Protein Ladder

kDa

245 ––

100 ––

140 ––

180 ––

**CSE (44 kDa)**

60 ––

75 ––

35 ––

45 ––

25 ––

20 ––

10 ––

15 ––

~5 ––

n=2 (CSE)





ExcelbandTM Enhanced 3-Colour High Ranged Protein Marker

(SMOBIO Technology, Inc.)

kDa

Sham

OVX

OVXS

OVXM

OVXMS

60 ––

45 ––

**CSE (44 kDa)**

35 ––

20 ––

25 ––

10 ––

15 ––

n=3 (CSE) Representative image





kDa

OVXMS

OVXM

OVXS

Sham

OVX

25 ––

45 ––

**CSE (44 kDa)**

35 ––

20 ––
