# Supplementary material for: S-Allylcysteine Attenuates Myocardial Injury Via Antioxidant Pathway in Ovariectomised Rat Model
Source: Research Square preprint supplement (doi:10.21203/rs.3.rs-6158102/v1), 2025-03-11
Supplement: Supplementary file 2 [file 349eb8ab59be6f56b7b6c637.docx]

**Supplementary Figure**


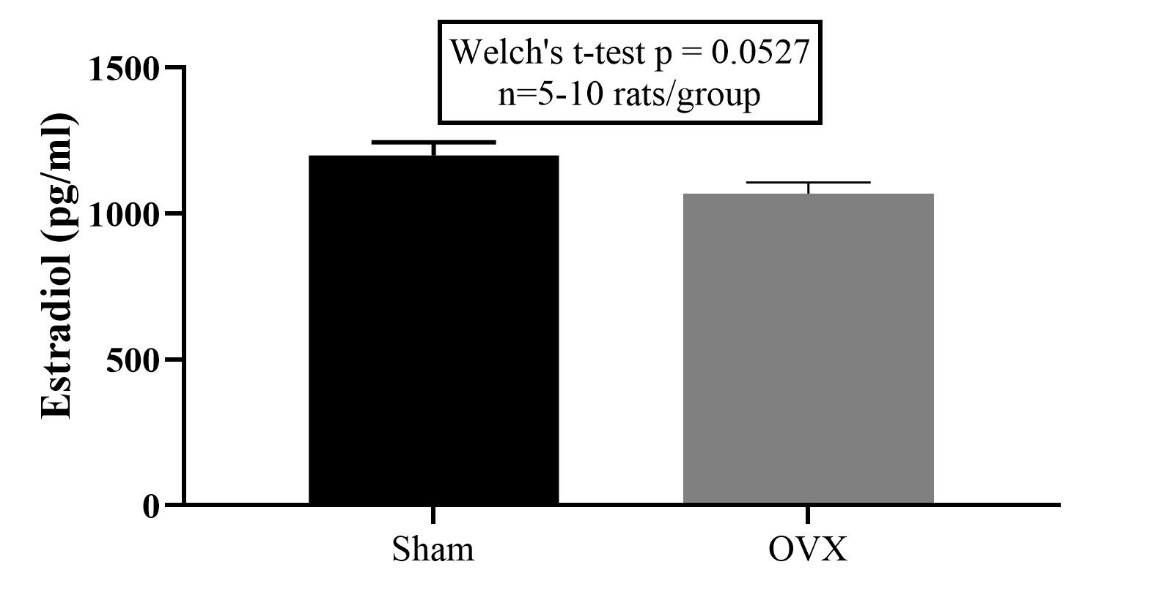


**Supplementary Fig. 1** Measurement of estradiol level after 3 weeks post-ovariectomy surgery between sham-operated and ovariectomy group.


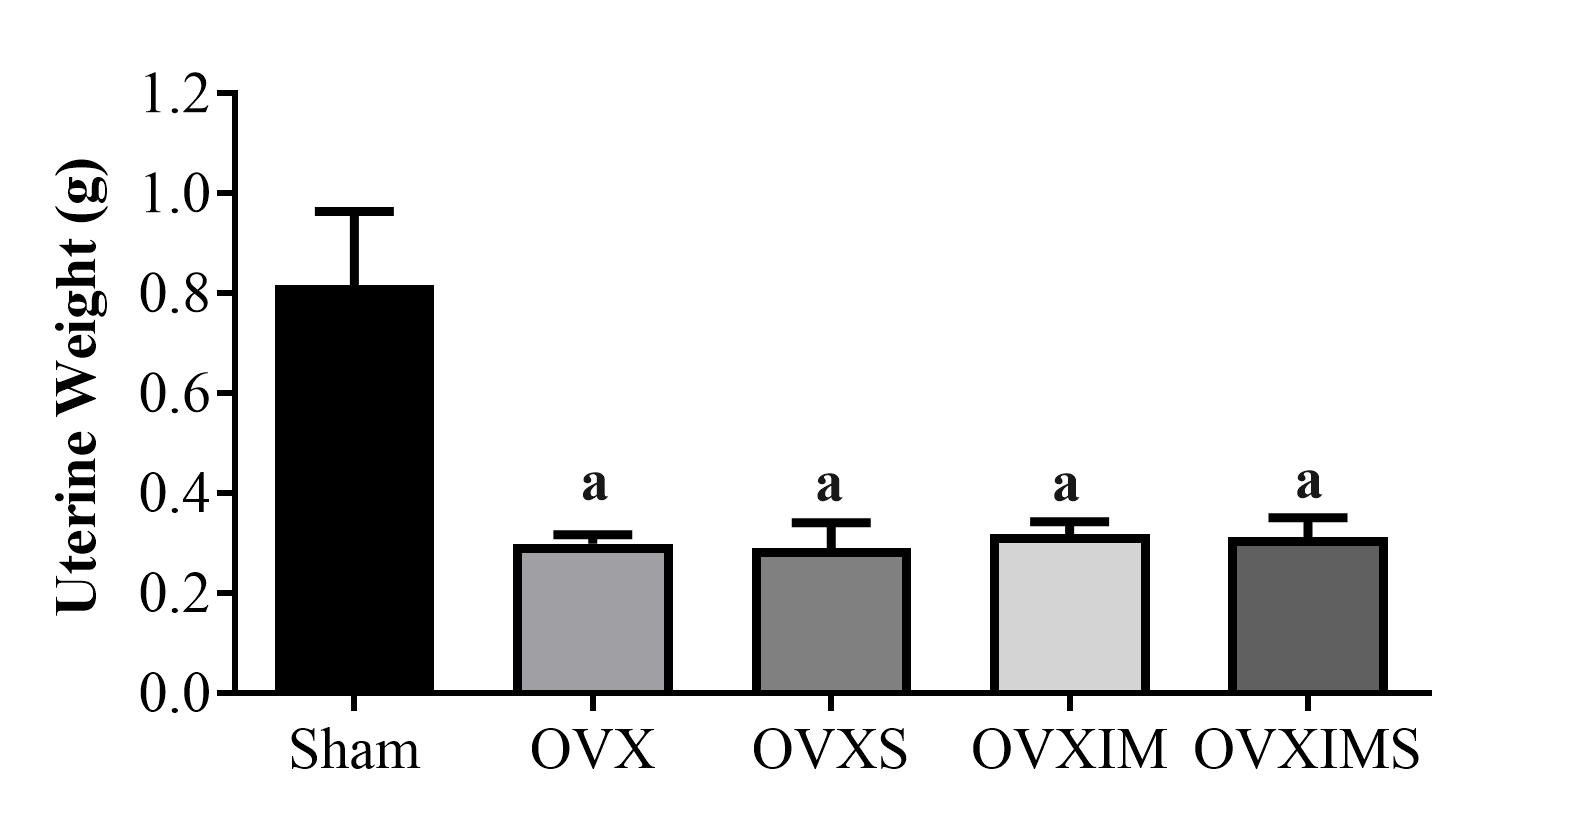


**Supplementary Fig. 2** Measurement of uterine weight at the end period of the experiment between sham-operated and ovariectomy group.


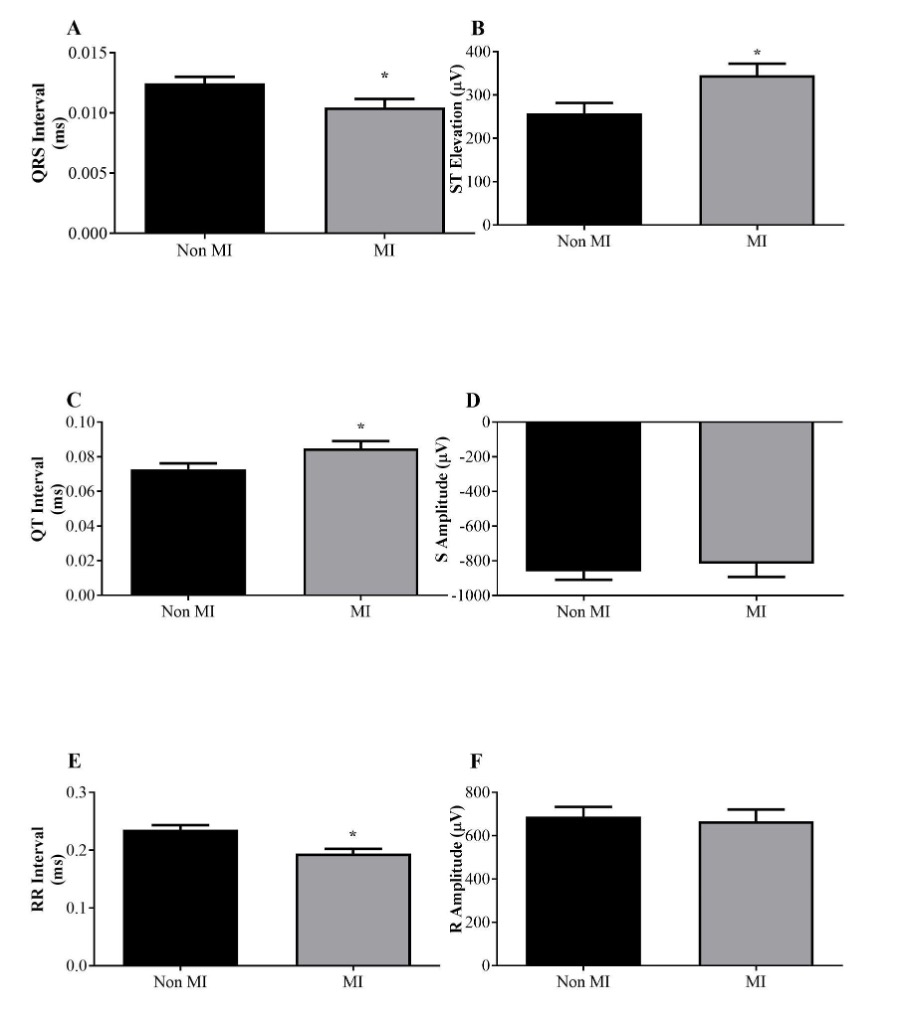


**Supplementary Fig. 3** Electrocardiogram parameters difference between non-MI induced group and MI-induced group.


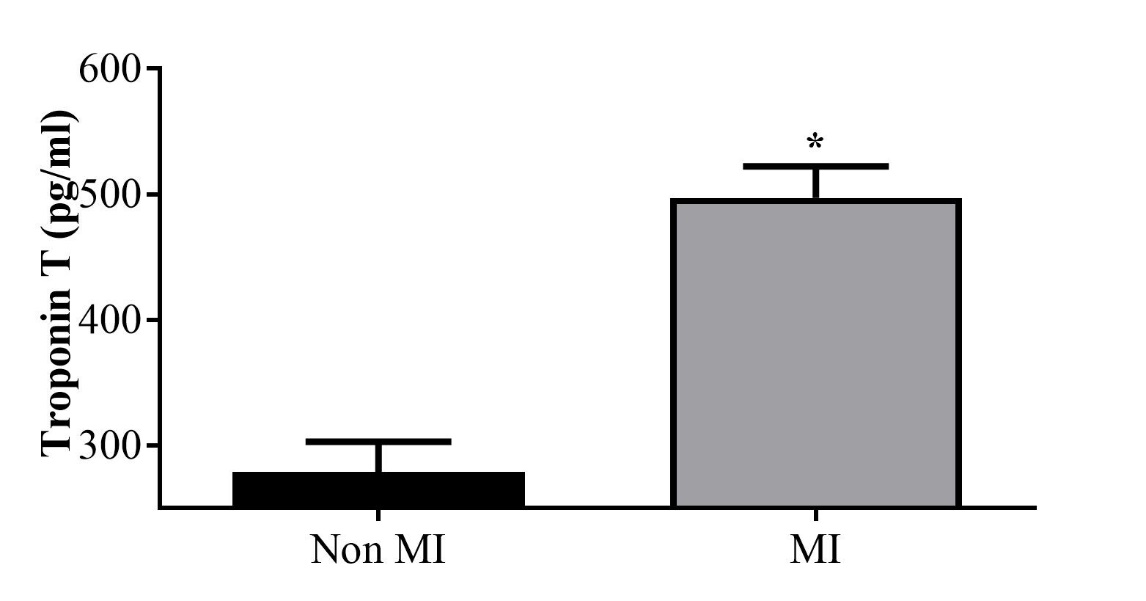


**Supplementary Fig. 4** Measurement of cardiac marker Troponin T between non-MI induced group and MI-induced group.
